# Supplementary material for: Satisfactory In Vitro Activity of Ceftolozane–Tazobactam against Carbapenem-Resistant Pseudomonas aeruginosa But Not against Klebsiella pneumoniae Isolates
Source: MDPI journal article supplement (doi:10.3390/medicina59030518), 2023-03-07
Supplement: s1 [file s1]

## Supplementary material

Satisfactory *in vitro* activity of ceftolozane-tazobactam against carbapenem-resistant *Pseudomonas aeruginosa* but not against *Klebsiella pneumoniae* isolates

Alicja Sękowska<sup>1,2\*</sup>, Marta Grabowska<sup>1,3</sup>, Tomasz Bogiel<sup>1,2\*</sup>

<sup>1</sup>Microbiology Department, Ludwik Rydygier Collegium Medicum in Bydgoszcz, Nicolaus Copernicus University in Torun, Poland

<sup>2</sup> Clinical Microbiology Department dr Antoni Jurasz University Hospital No 1 in Bydgoszcz, Poland

<sup>3</sup> dr Jan Biziel University Hospital No 2 in Bydgoszcz, Poland

\* Correspondence: Alicja Sękowska (e-mail: asekowska@cm.umk.pl), Tomasz Bogiel (t.bogiel@cm.umk.pl), Microbiology Department, Ludwik Rydygier Collegium Medicum in Bydgoszcz, Nicolaus Copernicus University in Torun, 9 Maria Skłodowska-Curie St, 85-094 Bydgoszcz, Poland, tel.: +48 52 585 44 80

**Table S1.** The detailed susceptibility profiles of the examined *P. aeruginosa* strains ( $n = 150$ )

| Patient No./isolate | Piperacillin/tazobactam | Ceftazidime | Cefepime | Imipenem | Meropenem | Tobramycin | Amikacin | Ciprofloxacin | Levofloxacin | Colistin | Ceftolozane/tazobactam | Ceftolozane/tazobactam MIC |
|---------------------|-------------------------|-------------|----------|----------|-----------|------------|----------|---------------|--------------|----------|------------------------|----------------------------|
| 1                   | S                       | S           | R        | R        | R         | R          | R        | R             | R            | S        | S                      | 2                          |
| 2                   | R                       | R           | R        | R        | R         | S          | R        | R             | R            | S        | S                      | 2                          |
| 3                   | R                       | R           | R        | R        | S         | R          | R        | R             | R            | S        | R                      | 8                          |
| 4a                  | R                       | R           | S        | R        | S         | S          | S        | R             | R            | S        | S                      | 0.5                        |
| 4b                  | S                       | S           | R        | R        | S         | R          | S        | S             | R            | S        | S                      | 0.75                       |
| 5                   | S                       | S           | S        | R        | R         | S          | S        | R             | R            | S        | S                      | 1                          |
| 6                   | R                       | R           | R        | R        | R         | S          | S        | R             | R            | S        | S                      | 0.75                       |
| 7                   | R                       | R           | R        | R        | R         | R          | S        | R             | R            | S        | S                      | 1.5                        |
| 8                   | R                       | R           | R        | R        | R         | S          | S        | R             | S            | S        | S                      | 2                          |
| 9                   | R                       | R           | I        | R        | S         | R          | S        | R             | R            | S        | S                      | 0.5                        |
| 10a                 | R                       | R           | R        | R        | R         |            | S        | R             | R            | S        | S                      | 0.5                        |
| 10b                 | R                       | S           | S        | R        | R         | S          | S        | R             | R            | S        | S                      | 1                          |
| 11a                 | R                       | R           | R        | R        | R         | S          | S        | R             | R            | S        | S                      | 1                          |
| 11b                 | R                       | R           | S        | R        | R         | R          | S        | R             | R            | S        | S                      | 0.75                       |
| 12                  | R                       | S           | R        | R        | R         | S          | S        | S             | R            |          | S                      | 1                          |
| 13                  | R                       | R           | R        | R        | R         | R          | R        | R             | R            | S        | S                      | 1                          |
| 14a                 | R                       | R           | R        | R        | R         | S          | S        | S             | S            | S        | S                      | 0.75                       |
| 14b                 | R                       | R           | R        | R        | R         | S          | S        | S             | S            | S        | S                      | 2                          |
| 15                  | R                       | R           | R        | R        | R         | S          | S        | S             | S            | S        | S                      | 1.5                        |

|     |   |   |   |   |   |   |   |   |   |   |   |      |
|-----|---|---|---|---|---|---|---|---|---|---|---|------|
| 16  | R | R | R | R | R | R | R | R | R | S | S | >256 |
| 17  | R | R | R | R | S | S | S | S |   | S | S | 1    |
| 18  | R | R | R | R | R | R | R | R | R | S | R | 6    |
| 19  | S | S | S | R | S | S | S | S | S | S | S | 1    |
| 20a | R |   | R | R | R | S | S | R | R | S | S | 4    |
| 20b | R | R | I | R | R | S | S | R | R | S | R | 6    |
| 20c | R | R | R | R | R | R | R | R | R | S | S | 3    |
| 20d | R | R | R | R | R | R | R | S | S | S | S | 4    |
| 20e | R | R | R | R | S | R | R | S | S | S | S | 3    |
| 20f | R | R | R | R | S | S | S | S | S | S | S | 2    |
| 20g | S | S | S | R | S | S | S | S | S | S | S | 1.5  |
| 21a | R | I | R | R | R | R | R | R | R | R | S | 1.5  |
| 21b | R | I | R | R | R | R | R | R | R | S | S | 3    |
| 22  | R | R | R | R | R | S | S | S | R | S | S | 1    |
| 23  | R | R | I | R | R | S | S | I | I | S | R | >256 |
| 24  | R | R | R | R | R | S | S | I | I | S | S | 1.5  |
| 25  | R | R | R | R | R | S | S | R | R | S | S | 1.5  |
| 26  | S | S | S | R | S | S | S | S |   | S | S | 0.5  |
| 27a | R | R | R | R | R | S | S | R | R | S | S | 1    |
| 27b | I | R | R | R | R | S | S | R | I | S | S | 4    |
| 28  | R | R | R | R | R | S | S | R | R | S | S | 2    |
| 29  | R | R | R | R | R | S | S | R | R | S | S | 2    |
| 30  | R | R | R | R | R | S | S | R | R | S | S | 4    |
| 31  | I | I | I | R | I | S | S | R | R | S | S | 4    |
| 32  | R | R | R | R | R | S | S | R | R | S | S | 1.5  |
| 33  | S | S | S | R | R | R | R | R | R | S | S | 1.5  |
| 34  | R | R | R | R | R | S | S | S | R | S | S | 3    |
| 35  | R | R | R | R | R | S | S | S | S | S | S | 2    |
| 36  | R | R | R | R | R | S | S | R | R | S | S | 3    |
| 37  | R | R | R | R | R | S | S | S | R | S | S | 1.5  |
| 38  | R | R | R | R | R | S | S | R | R | S | S | 1.5  |
| 39  | S | S | S | R | S | S | S | S | S | S | S | 1.5  |
| 40  | S | S | S | R | R |   | R | R | R |   | S | 1.5  |
| 41  | S | S | S | I | R | S | S | S | R | S | S | 1    |
| 42  | R | R | R | R | R | R | R | R | R | S | R | 96   |
| 43  | R | R | R | R | R | S | S | R | R | S | S | 2    |
| 44  | R | R | R | R | S | S | S | S | S | S | S | 4    |
| 45  | I | I | I | R | S | S | S | R | R | S | S | 0.5  |
| 46  | S | S | S | R | S | S | S | S | S | S | S | 1.5  |
| 47  | R | R | R | R | R | R | R | S | S |   | R | 256  |
| 48  | S | S | S | R | S | S | S | S | R | S | S | 0.75 |
| 49  | R | R | R | R | R | S | S | R | R | S | S | 2    |
| 50a | R | R | R | R | R | S | S | R | R | S | S | 3    |
| 50b | R | R | R | R | R | S | S | I | R | S | R | 6    |
| 51  | R | S | R | I | R | R | R | R | R | S | S | 2    |
| 52  | S | R | R | I | R | S | R | R | R | S | S | 2    |
| 53  | R | R | R | R | R | S | S | S | S | S | S | 1.5  |

|     |   |   |   |   |   |   |   |   |   |   |   |      |
|-----|---|---|---|---|---|---|---|---|---|---|---|------|
| 54  | R | R | R | R | R | R | S | R | R | S | R | >256 |
| 55  | R | R | R | R | R | S | R | R | R | S | S | 4    |
| 56  | R | R | R | R | R | R | R | S | S | S | R | >256 |
| 57  | R | R | R | R | R | S | S | S | S | S | S | 2    |
| 58  | S | S | S | R | S | S | S | S | S |   | S | 0.5  |
| 59  | I | R | R | R | I | R | R | R | R | R | R | 8    |
| 60a | R | R | R | R | S | S | S | R | R | R | R | 6    |
| 60b | S | S | S | R | S | S | S | R | R | S | S | 0.75 |
| 61  | R | R | R | R | R | S | S | S | S | S | S | 1    |
| 62  | R | R | R | R | R | R | R | S | R |   | S | 1    |
| 63a | R | S | R | I | S | R | R | S | S | S | S | 1.5  |
| 63b | S | S | S | S | S | R | S | S | S | S | S | 0.25 |
| 64  | R | R | R | R | S | S | S | S | S | S | S | 1    |
| 65  | R | R | R | R | S | S | S | S | R | S | S | 1.5  |
| 66a | R | R | R | R | R | S | S | R | R | R | S | 3    |
| 66b | R | R | S | R | R | S | S | R | R | R | S | 1.5  |
| 67  | S | S | R | R | R | S | S | S | R |   | S | 0.75 |
| 68  | R | R | R | S | S | R | R | R | R | S | S | 1    |
| 69  | R | R | R | R | R | S | S | R | R | S | R | 6    |
| 70  | R | R | R | I | S | S | S | R | I | S | S | 1.5  |
| 71a | R | R | R | R | R | S | S | R | R | S | S | 4    |
| 71b | R | S | R | R | R | S | S | S | R | S | S | 1.5  |
| 72  | R | R | R | R | R | R | R | R | R | S | R | >256 |
| 73  | R | R | R | R | R | R | R | R | R | S | S | 0.75 |
| 74  | R | R | R | R | R | S | S | R | R | S | R | 8    |
| 75  | S | S | S | R | R | S | S | S | S | S | S | 1    |
| 76  | R | S | R | R | S | S | S | R | R | S | S | 0.75 |
| 77  | S | R | S | R | R | R | R | R | R | S | S | 1    |
| 78  | R | R | S | R | R | R | R | S |   | S | S | 4    |
| 79  | R | R | S | R | R | R | R | R | R | S | S | 0.75 |
| 80  | R | R | R | R | R | S | S | S | S | S | S | 2    |
| 81  | R | R | S | R | R | R | S | R | R | S | R | >256 |
| 82  | S | S | S | R | R | S | S | R | R | S | S | 0.75 |
| 83  | R | I | R | R | R | R | S | R | R | S | S | 0.75 |
| 84  | R | R | R | R | R | R | R | R | I | S | R | >256 |
| 85  | R | R | R | R | R | S | S | R | R | S | S | 4    |
| 86  | R | R | R | R | R | R | R | R | R | S | R | >256 |
| 87  | R | R | R | R | R | R | R | R | R | S | S | 1    |
| 88  | R | R | R | R | R | R | R | R | R | S | S | 1.5  |
| 89  | R | R | R | R | R | R | R | R | R | S | S | 1.5  |
| 90a | R | R | R | R | R | S | S | S | S | S | S | 0.75 |
| 90b | R | R | R | R | R | S | S | S | S | S | S | 2    |
| 90c | S | S | S | R | S | S | S | S | S | S | S | 2    |
| 91  | R | R | R | R | R | S | S | R | R | S | S | 1    |
| 92  | R | I | R | R | R | S | S | R | R | S | S | 2    |
| 93a | R | R | R | R | R | S | S | R | R | S | S | 1.5  |
| 93b | R | R | R | R | R | S | S | S | R | R | S | 2    |

|      |   |   |   |   |   |   |   |   |   |   |   |      |
|------|---|---|---|---|---|---|---|---|---|---|---|------|
| 94   | S | S | S | R | R | S | S | S | S |   | S | 1    |
| 95   | S | S | S | R | S | S | S | S | S |   | S | 1    |
| 96   | S | S | S | R | S | S | S | S | S | S | S | 2    |
| 97   | R | R | R | R | S | S | S | S | I | S | S | 1    |
| 98   | R | R | R | R | R | S | S | S | R | S | R | 48   |
| 99   | R | R | R | R | R | S | S | R | R | S | S | 2    |
| 100a | I | R | R | R | R | S | S | R | R | R | S | 0.19 |
| 100b | R | R | R | R | R | S | S | R | R | S | S | 2    |
| 101  | R | R | R | R | R | S | S | R | R | S | S | 1.5  |
| 102  | S | S | S | R | S | S | S | S | S | S | S | 1    |
| 103a | R | R | R | R | R | S | S | S | R | S | S | 1.5  |
| 103b | R | R | R | R | R |   | R | R |   | S | S | 0.75 |
| 104  | S | S | S | S | S | S | S | S | S | S | S | 0.75 |
| 105  | R | R | R | R | R | S | S | R | R | R | S | 3    |
| 106  | S | R | S | R | R | R | R | S | S | S | S | 0.75 |
| 107  | R | S | R | R | R | S | R | R | R | S | S | 1.5  |
| 108  | R | R | R | R | R | S | S | R | R | S | S | 1    |
| 109  | S | S | S | R | S | S | S | S |   | S | S | 0.25 |
| 110  | R | R | R | R | S | S | S | S |   | S | R | 256  |
| 111  | R | R | R | R | S | R | R | S | R | S | S | 1    |
| 112a | R | R | R | R | R | S | S | R | R | R | S | 4    |
| 112b | R | R | R | R | R | S | R | R | R | S | S | 4    |
| 112c | R | R | R | R | R | S | S | R | R | S | R | 8    |
| 113  | R | R | S | R | R | S | S | S | S | S | S | 0.75 |
| 114  | R | R | R | R | R | R | R | R | R | S | R | 256  |
| 115  | R | R | R | R | S | R | R | R | R | R | R | 64   |
| 116  | R | R | S | R | R | R | R | R | R | S | S | 1.5  |
| 117  | R | R | R | R | R | S | S | R | R |   | S | 1.5  |
| 118  | R | R | R | R | S | S | S | S | S | S | S | 4    |
| 119  | R | R | R | R | S | S | S | R | R | S | S | 1    |
| 120  | R | R | R | R | S | R | R | R | R | S | R | 6    |
| 121  | S | S | S | R | S | S | S | S | S | S | S | 0.75 |
| 122  | R | R | R | R | R | R | R | R | I | S | R | >256 |
| 123  | I | I | I | R | S | S | S | R | R | S | S | 0.75 |
| 124  | R | S | R | S | S | R | R | R | R | S | S | 2    |
| 125  | R | R | S | R | R | R | R | R | R | S | S | 4    |
| 126  | R | R | R | R | R | S | S | R | R | S | S | 2    |

a - g - subsequent isolates derived from the same patient; EUCAST antimicrobials susceptibility categories: I - susceptible, increased exposure, R - resistant, S - susceptible at standard doses; MIC – minimal inhibitory concentration

**Table S2.** The detailed susceptibility profiles of the examined *K. pneumoniae* strains ( $n = 100$ )

| Patient No./isolate | Piperacillin/tazobactam | Cefotaxime | Ceftazidime | Cefepime | Imipenem | Meropenem | Ertapenem | Tobramycin | Gentamicin | Amikacin | Ciprofloxacin | Levofloxacin | Trimethoprim/sulfamethoxazole | Colistin | ESBL | Ceftolozane/tazobactam | Ceftolozane/tazobactam MIC |
|---------------------|-------------------------|------------|-------------|----------|----------|-----------|-----------|------------|------------|----------|---------------|--------------|-------------------------------|----------|------|------------------------|----------------------------|
| 1                   | R                       | R          | R           | R        | I        | I         | R         | R          | S          | I        | R             | R            | R                             | S        | +    | R                      | >256                       |
| 2a                  | R                       | R          | R           | R        | S        | S         | R         | R          | I          | S        | R             | R            | R                             | S        | +    | R                      | 48                         |
| 2b                  | R                       | R          | R           | R        | S        | R         | R         | S          | S          | S        | I             | I            | S                             | S        | +    | R                      | 256                        |
| 3                   | R                       | R          | R           | R        | R        | R         | R         | R          | R          | R        | R             | R            |                               |          | +    | R                      | 256                        |
| 4                   | S                       | R          | R           | R        | S        | R         | R         | R          | R          | S        | R             | R            | R                             | R        | +    | S                      | 0.75                       |
| 5a                  | R                       | R          | R           | R        | R        | R         | R         | I          | S          | I        | S             | S            | R                             | S        | +    | R                      | >256                       |
| 5b                  | R                       | R          | R           | R        | R        | R         | R         | S          | S          | S        | S             | S            | R                             | S        | +    | R                      | >256                       |
| 6                   | R                       | R          | R           | R        | I        | R         | R         | R          | S          | R        | R             | R            | R                             | R        | +    | R                      | 256                        |
| 7                   | R                       | R          | R           | R        | S        | S         | R         | R          | R          | S        | R             | R            | R                             |          | +    | R                      | 6                          |
| 8                   | R                       | R          | R           | R        | S        | I         | R         | S          | S          | S        | R             | R            | R                             | S        | +    | R                      | >256                       |
| 9                   | R                       | R          | R           | R        | I        | R         | R         | R          | R          | I        | R             | R            | R                             | R        | +    | S                      | 2                          |
| 10                  | R                       | R          | R           | R        | I        | R         | R         | R          | R          | I        | R             | R            | R                             | S        | +    | R                      | 4                          |
| 11                  | R                       | R          | R           | S        | R        | R         | R         | R          | R          | I        | R             | R            | R                             |          | +    | S                      | 1                          |
| 12                  | R                       | R          | R           | S        | R        | R         | R         | R          | R          | I        | R             | R            | R                             |          | +    | R                      | 4                          |
| 13                  | R                       | R          | R           | R        | I        | I         | R         | R          | R          | R        | S             | R            | R                             | S        | +    | S                      | 1                          |
| 14                  |                         |            |             |          | R        | R         | R         |            |            |          |               |              |                               |          | +    | R                      | >256                       |
| 15                  | R                       | R          | R           | R        | I        | R         | R         | R          | R          | R        | R             | R            |                               |          | +    | S                      | 0.5                        |
| 16                  | R                       | R          | R           | R        | S        | R         | R         | R          | R          | S        | R             | R            | R                             | S        | +    | R                      | >256                       |
| 17                  | S                       | S          | S           | S        | S        | S         | R         | S          | S          | S        | R             | R            | R                             | S        | +    | S                      | 0.38                       |
| 18                  | R                       | R          | R           | R        | S        | S         | R         | R          | R          | I        | R             | R            | R                             | S        | +    | R                      | 48                         |
| 19                  | R                       | R          | I           | R        | I        | R         | R         | R          | R          | R        | S             | R            | R                             | R        | +    | S                      | 0.38                       |
| 20                  | R                       | R          | R           | R        | I        | R         | R         | R          | R          | S        | R             | R            | R                             | R        | +    | R                      | >256                       |
| 21a                 | I                       | R          | R           | R        | S        | I         | S         | R          | S          | I        | R             |              | R                             |          | +    | S                      | 1                          |
| 21b                 | R                       | R          | R           | R        | I        | R         | R         | R          | S          | I        | R             | R            | R                             | S        | +    | R                      | >256                       |
| 22                  | R                       | R          | R           | R        | I        | R         | R         | R          | R          | S        | R             | R            | R                             |          | +    | R                      | >256                       |
| 23                  | R                       | R          | R           | R        | S        | S         | R         | R          | I          | S        | S             | S            | R                             | S        | +    | R                      | 48                         |
| 24                  | R                       | R          | R           | R        | I        | I         | R         | R          | R          | R        | S             | R            |                               | S        | +    | R                      | 6                          |
| 25                  | R                       | R          | R           | R        | S        | I         | S         | R          | S          | I        | R             | R            | R                             | S        | +    | S                      | 1.5                        |
| 26                  | R                       | R          | R           | R        | S        | I         | R         | R          | S          | I        | R             | R            | R                             | S        | +    | R                      | 6                          |
| 27                  | S                       | R          | R           | R        | R        | I         | R         | S          | S          | S        | R             | R            | R                             | R        | +    | R                      | >256                       |
| 28                  | R                       | R          | R           | R        | R        | R         | R         | R          | R          | R        | R             | R            |                               | S        | +    | S                      | 2                          |
| 29                  | I                       | R          | R           | R        | I        | I         | R         | R          | S          | R        | R             | R            | S                             | S        | +    | R                      | 6                          |
| 30                  | R                       | R          | R           | R        | S        | S         | R         | R          | I          | S        | R             | R            | R                             | S        | +    | S                      | 2                          |
| 31a                 | R                       | R          | R           | R        | R        | R         | R         | R          | R          | S        | R             | R            | R                             | R        | +    | R                      | 256                        |
| 31b                 | R                       | R          | R           | R        | S        | I         | R         | R          | R          | S        | R             | R            | R                             | R        | +    | R                      | >256                       |

|     |   |   |   |   |   |   |   |   |   |   |   |   |   |   |   |   |      |
|-----|---|---|---|---|---|---|---|---|---|---|---|---|---|---|---|---|------|
| 32  | R | R | R | R | S | R | R | R | R | R | R | R | S | S | + | R | 256  |
| 33  | S | R | R | R | S | S | R | R | S | I | R | R | R |   | + | S | 0.75 |
| 34  | R | R | R | R | S | S | R | R | I | S | R | R | R |   | + | R | 4    |
| 35a | R | R | R | R | S | S | R | R | S | R | R | R | S | R | + | R | 4    |
| 35b | I | R | R | R | S | S | R | R | S | R | R | R | S | R | + | R | 6    |
| 36  | R | R | R | R | I | R | R | R | R | S | R | R | R | S | + | R | >256 |
| 37  | R | R | R | R | R | R | R | R | S | I | R |   | R | S | + | R | 256  |
| 38  | R | R | R | R | I | R | R | R | R | R | R | R |   |   | + | R | 16   |
| 39  | R | R | R | R | R | R | R | S | S | S | R | R | R | R | + | R | 256  |
| 40  | R | R | R | R | R | R | R | S | S | S | R | R | R | S | + | R | >256 |
| 41  | R | R | R | R | S | S | R | R | I | S | S | S | R |   | + | S | 1    |
| 42  | R | R | R | R | S | I | R | R | S | R | R | R | R | S | + | R | >256 |
| 43  | R | R | R | R | R |   | R | R | R | R | R | R |   |   | + | S | 0.5  |
| 44  | R | R | R | R | S | S | R | R | R | I | R |   | R | R | + | R | 96   |
| 45  | R | R | R | R | R | R | R | R | I | S | R | R | R | S | + | R | >256 |
| 46  | R | R | R | R | S | I | R | R | R | S | R | R | R | S | + | R | >256 |
| 47  | R | R | R | R | R | O | R | R | R | R | R | R |   | S | + | S | 0.38 |
| 48  | R | R | R | R | S | S | R | R | R | S | R | R | R |   | + | R | 48   |
| 49  | R | R | R | R | S | S | R | R | I | S | R | R | R | S | + | R | >256 |
| 50  | R | R | R | R | R | R | R | R | R | I | R | R | R | R | + | S | 0.75 |
| 51  | R | R | R | R | R | R | R | S | S | S | R | R | R | S | + | R | >256 |
| 52  | R | R | R | R | S | S | R | R | I | S | R | R | R |   | + | S | 1    |
| 53  | R | R | R | R | S | I | R | R | R | S | R | R | R | S | + | R | >256 |
| 54  | R | R | R | R | S | S | R | R | R | R | R | R | R | R | + | R | 4    |
| 55  | R | R | R | R | S | S | R | R | S | I | R | R | R | S | + | R | >256 |
| 56  | R | R | R | R | R | I | R | R | S | I | I | S | R | R | + | S | 2    |
| 57  | R | R | R | R | I | R | R | R | S | I | R | R | R | R | + | R | >256 |
| 58  | R | R | R | S | R | R | R | R | R | R | R | R | R | R | + | R | 3    |
| 59  | R | R | R | R | R | R | R | R | S | I | R | R | S | S | + | R | 256  |
| 60  | R | R | R | R | S | S | R | R | R | S | R | R | R | S | + | S | 0.75 |
| 61  | R | R | R | S | R | R | R | R | S | R | R | R | R |   | + | R | 3    |
| 62  | R | R | R | R | R | R | R | R | R | I | R | R | R | R | + | S | 1    |
| 63  | R | R | R | R | I | R | R | S | S | S | R | R | R | S | + | R | >256 |
| 64  | R | R | R | R | I | R | R | R | I | R | R | R | R | S | + | R | >256 |
| 65  | R | R | R | R | R | R | R | R | R | I | R | R |   | S | + | S | 2    |
| 66  | R | R | R | R | R | R | R | R | S | I | R | R | R | S | + | S | 0.38 |
| 67  | R | R | R | R | I | I | R | R | S | I | R | R | R | S | + | R | >256 |
| 68  | R | R | R | R | S | S | R | R | S | I | R | R | R | S | + | R | >256 |
| 69  | R | R | R | R | S | S | R | R | R | I | R | R | R | R | + | R | 4    |
| 70  | R | R | R | R | S | S | R | R | I | S | R | R | R | S | + | R | 196  |
| 71  | R | R | R | R | S | R | R | R | R | R | R | R | R | R | + | R | 256  |
| 72  | R | R | R | R | R | R | R | R | S | R | I | R |   | S | + | S | 0.5  |
| 73  | R | R | R | R | S | I | R | R | I | S | R | R | R | S | + | R | 256  |
| 74  | R | R | R | R | S | S | R | R | R | I | R |   | R | R | + | R | 3    |
| 75  | R | R | R | R | S | S | R | R | I | S | R | R | R |   | + | R | 12   |
| 76  | R | R | R | R | I | I | R | R | R | I | R | R | R | S | + | R | 256  |
| 77  | R | R | R | R | S | R | R | R | R | R | R | R |   |   | + | R | 4    |

|     |   |   |   |   |   |   |   |   |   |   |   |   |   |   |   |   |      |
|-----|---|---|---|---|---|---|---|---|---|---|---|---|---|---|---|---|------|
| 78a | S | R | R | R | S | S | R | R | S | I | R | R | R | S | + | S | 0.38 |
| 78b | I |   | R | R | S | S | R |   | S | S | R |   | R | S | + | S | 0.5  |
| 79  | R | R | R | R | S | S | R | R | I | S | R | R | R | S | + | R | >256 |
| 80  | R | R | R | R | R | R | R | R | I | S | R | R | S | R | + | R | 256  |
| 81  | R | R | R | R | I | R | R | R | R | S | R | R | R | S | + | R | 64   |
| 82  | R | R | R | S | S | R | R | R | R | I | R | R | O |   | + | S | 1.5  |
| 83  | R | R | R | R | R | R | R | R | R | R | R | R | O | S | + | S | 1.5  |
| 84  | R | R | R | S | S | R | R | R | R | I | S | R | O | S | + | S | 1.5  |
| 85a | R | R | R | R | I | S | S | R | S | S | R | R | O | R | + | S | 2    |
| 85b | R | R | R | R | I | I | R | R | R | S | R | R | O | R | + | R | >256 |
| 86  | R | R | R | R | S | I | S | R | I | S | R |   | O | S | + | R | 6    |
| 87  | R | R | R | R | I | I | R | R | I | S | R | R | O | R | + | R | 256  |
| 88  | R | R | R | R | S | S | R | R | R | S | R | R | O |   | + | S | 1    |
| 89  | R | R | R | R | S | S | R | R | I | S | R | R | O | S | + | R | >256 |
| 90  | R | R | R | R | S | S | R | R | I | I | R |   | O | S | + | R | 4    |
| 91  | R | R | R | R | R | R | R | S | S | S | R | R | O | R | + | R | >256 |
| 92  | R | R | R | R | R | R | R | R | S | S | R | R | O | R | + | R | 8    |
| 93  | R | R | R | R | S | R | S | R | I | S | S | S | O |   | + | R | 12   |

a - b - subsequent isolates derived from the same patient; EUCAST antimicrobials susceptibility categories: I - susceptible, increased exposure, R - resistant, S - susceptible at standard doses; (+) - ESBL - extended spectrum beta-lactamases producers; MIC – minimal inhibitory concentration

**Table S3.** The origin of *P. aeruginosa* clinical strains included into the study (*n* = 206)

| Hospital unit/department/clinic     | <i>n</i> | %    |
|-------------------------------------|----------|------|
| Intensive Care                      | 110      | 53.4 |
| Pediatric Hematology and Oncology   | 38       | 18.4 |
| Transplantation and General Surgery | 23       | 11.2 |
| Cardiology                          | 11       | 5.3  |
| Nefrology                           | 9        | 4.4  |
| Neurosurgery                        | 5        | 2.4  |
| Vascular Surgery and Angiology      | 4        | 1.9  |
| Dermatology                         | 3        | 1.5  |
| Urology                             | 3        | 1.5  |
| Total                               | 206      | 100% |

| Specimen type                                                                                                                                                                      | <i>n</i> | %    |
|------------------------------------------------------------------------------------------------------------------------------------------------------------------------------------|----------|------|
| Bronchoalveolar lavage fluid                                                                                                                                                       | 69       | 33.5 |
| Blood                                                                                                                                                                              | 56       | 27.2 |
| Wound and bedsore swabs                                                                                                                                                            | 33       | 16.0 |
| Skin, catheter implantation site and surgery site swabs                                                                                                                            | 13       | 6.3  |
| Urine/catheterized urine                                                                                                                                                           | 10       | 4.8  |
| Stool                                                                                                                                                                              | 5        | 2.4  |
| Ear swab                                                                                                                                                                           | 3        | 1.5  |
| Fluid from the body cavities                                                                                                                                                       | 3        | 1.5  |
| Purulent material                                                                                                                                                                  | 2        | 1.0  |
| Vascular catheter                                                                                                                                                                  | 2        | 1.0  |
| The rest: peritoneal swab – 1, abdominal fluid – 1, sputum – 1, prosthesis – 1, peritoneal fluid – 1, bile – 1, pleural fluid – 1, rectal swab – 1, pharyngeal swab – 1, drain – 1 | 10       | 4.8  |
| Total                                                                                                                                                                              | 206      | 100% |



**Table S4.** The origin of *K. pneumoniae* clinical strains included into the study (*n* = 110)

| <b>Hospital unit/department/clinic</b>                                                                                                                | <b><i>n</i></b> | <b>%</b> |
|-------------------------------------------------------------------------------------------------------------------------------------------------------|-----------------|----------|
| Intensive Care                                                                                                                                        | 51              | 46.5     |
| Pediatric Hematology and Oncology                                                                                                                     | 18              | 16.5     |
| Transplantation and General Surgery                                                                                                                   | 11              | 10.0     |
| Nefrology                                                                                                                                             | 6               | 5.4      |
| Urology with outpatients                                                                                                                              | 5               | 4.5      |
| Cardiology                                                                                                                                            | 5               | 4.5      |
| Vascular Surgery and Angiology                                                                                                                        | 4               | 3.6      |
| Geriatrics                                                                                                                                            | 3               | 2.7      |
| Neurology                                                                                                                                             | 2               | 1.8      |
| The rest: Rehabilitation - 1, Endocrinology - 1, Cardiosurgery - 1, Pediatrics Allergology and Gastroenterology - 1, Infectious Diseases Hospital - 1 | 5               | 4.5      |
| Total                                                                                                                                                 | 110             | 100%     |

| <b>Specimen type</b>                                                                                                                                          | <b><i>n</i></b> | <b>%</b> |
|---------------------------------------------------------------------------------------------------------------------------------------------------------------|-----------------|----------|
| Urine/catheterized urine                                                                                                                                      | 22              | 20.0     |
| Blood                                                                                                                                                         | 21              | 19.1     |
| Wound and bedsore swabs                                                                                                                                       | 17              | 15.5     |
| Bronchoalveolar lavage fluid                                                                                                                                  | 17              | 15.5     |
| Stool                                                                                                                                                         | 6               | 5.4      |
| Rectal swab                                                                                                                                                   | 6               | 5.4      |
| Vascular catheter                                                                                                                                             | 5               | 4.5      |
| Skin, catheter implantation site and surgery site swabs                                                                                                       | 3               | 2.7      |
| Purulent material                                                                                                                                             | 3               | 2.7      |
| Pharyngeal swab                                                                                                                                               | 2               | 1.8      |
| The rest: bile – 1, peritoneal swab – 1, tissue – 1, peritoneal fluid – 1, drainage fluid – 1, vaginal swab – 1, fluid from the cyst – 1, abdominal fluid – 1 | 8               | 7.4      |
| Total                                                                                                                                                         | 110             | 100%     |
